# Supplementary material for: Regional Analgesia in Video-Assisted Thoracic Surgery: A Bayesian Network Meta-Analysis
Source: PubMed Central journal article supplement (PMC9019113; doi:10.3389/fmed.2022.842332), 2022-04-06
Supplement: Data_Sheet_1.pdf [file Data_Sheet_1.pdf]

## Supplementary materials

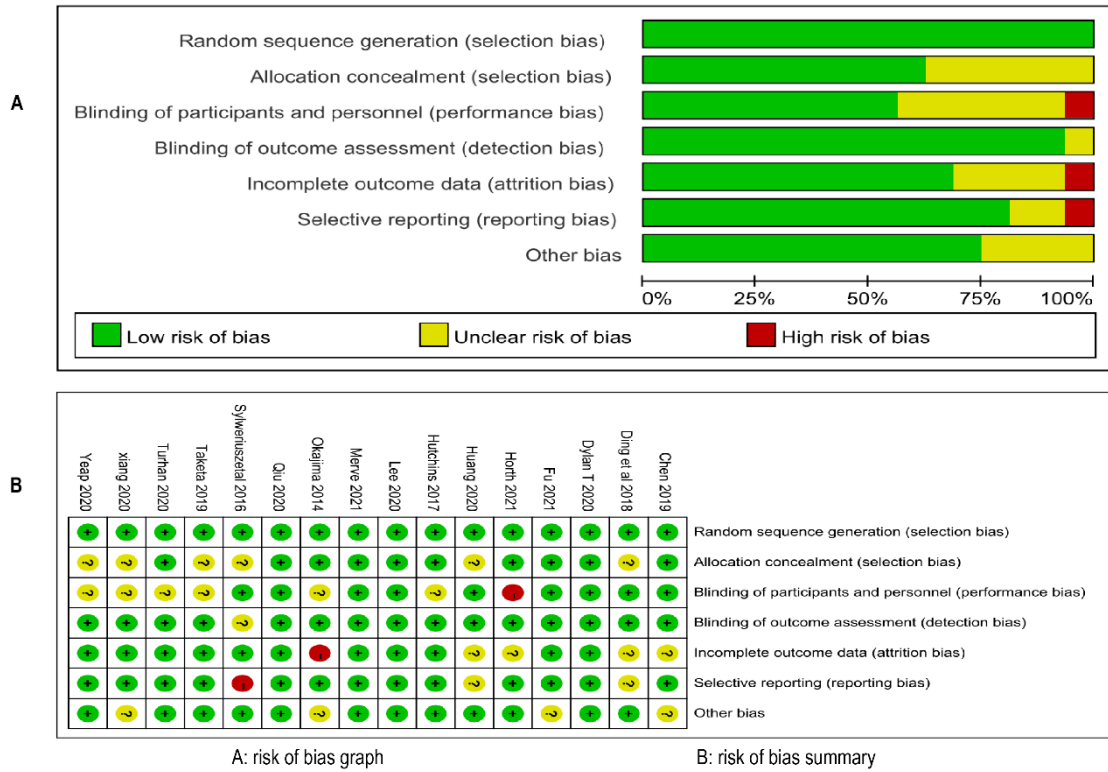

**Figure S1 study-level quality**

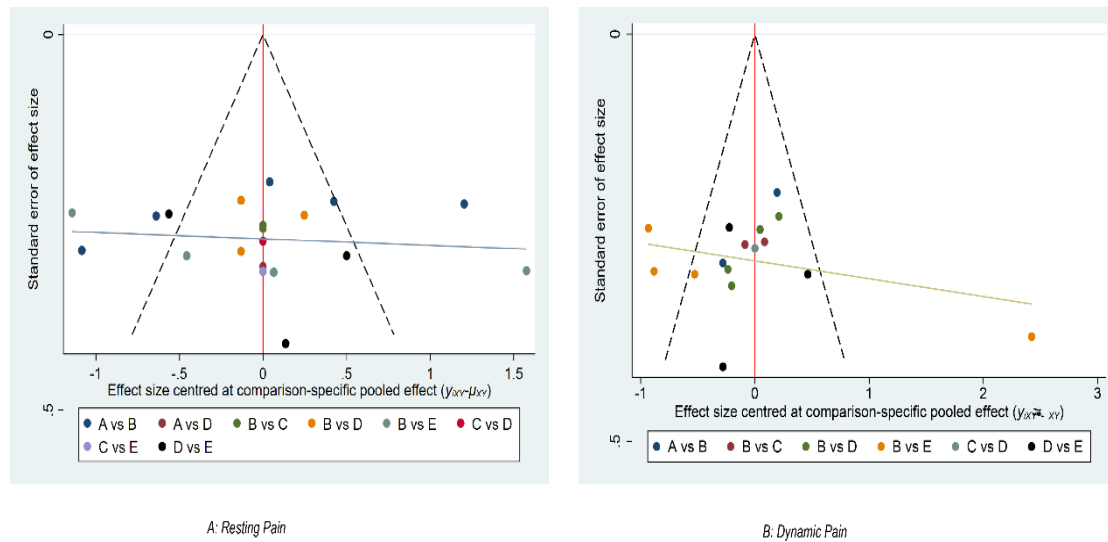

A: TEA epidural block; B: TPVB paravertebral block; C: SABP serratus anterior plane block; D: ESPB erector spinae plane; E: ICNB intercostal nerve block.

**Figure S2 funnel plot**
